# Supplementary material for: Label-free whole blood cell differentiation based on multiple frequency AC impedance and light scattering analysis in a micro flow cytometer
Source: Royal Society of Chemistry journal article supplement (doi:10.1039/c6lc00128a), 2016-01-01
Supplement: c6lc00128a1.pdf [file c6lc00128a1.pdf]

Electronic Supplementary Information for the Research Article:

### Label-free whole blood cell differentiation based on multiple frequency AC impedance and light scatter analysis in a micro flow cytometer

Peter Simon, Marcin Frankowski, Nicole Bock, Jörg Neukammer

Physikalisch-Technische Bundesanstalt (PTB), Abbestrasse 2-12, 10587 Berlin, Germany

**Figure s1:**

**a)** Immunological identification and colour gating of leukocyte subpopulations based on measurement of side scatter and CD45-FITC fluorescence intensities: Ly – lymphocytes; M – monocytes;  $G_n$  – neutrophilic and  $G_e$  – eosinophilic granulocytes.

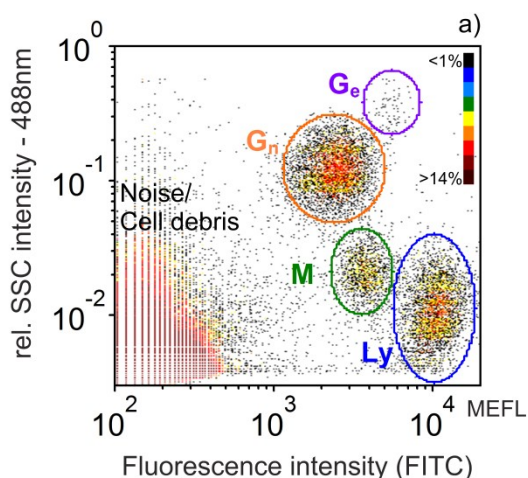

**b)** Colour-gated subpopulations of Ly, M,  $G_n$  and  $G_e$  leukocytes. Black dots indicate cell debris and noise (see manuscript Figure 6a).

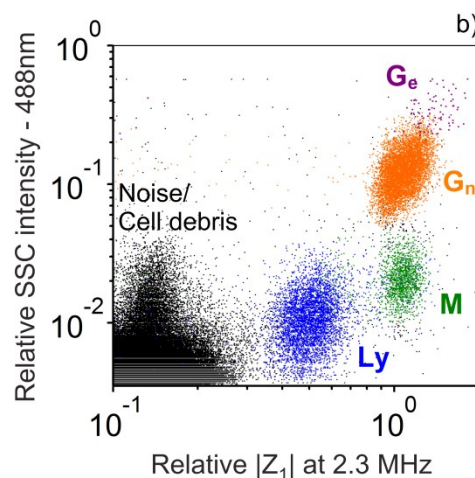

**Figure s2:**

**a)** Immunological identification and colour gating of red blood cells (RBC) and blood platelets (Plt) based on measurement of CD235a-FITC and CD61-PE fluorescence intensities.

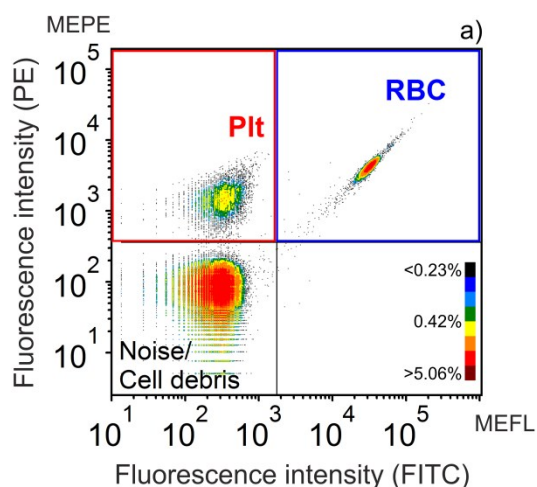

**b)** Colour-gated subpopulations of RBC and Plt. Black dots indicate cell debris and noise (see manuscript Figure 7a).

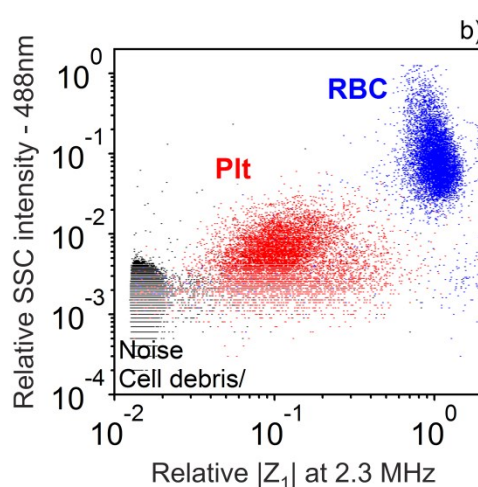

Note: The fluorescence dot-plot represents raw data, i.e. no colour compensation was used. Fluorescence intensities are expressed in MEFL – molecules of equivalent soluble fluorescein, and MEPE – molecules of equivalent soluble phycoerythrin units, respectively.
